# Supplementary material for: The synergic effects and mechanism of KGM–DMY complex in the prevention of obesity and enhancement of fatigue resistance in mice
Source: Royal Society of Chemistry journal article supplement (doi:10.1039/d2fo03677k), 2023-01-01
Supplement: d2fo03677k1.pdf [file d2fo03677k1.pdf]

## Supplementary material

### The synergic effects and mechanism of KGM-DMY complex in the prevention of obesity and enhancement of fatigue resistance in mice

Shulan Ruan<sup>1,2#</sup>, Xuefeng Gao<sup>1,2#</sup>, Bin Li<sup>1,2,3</sup>, Jing Tian<sup>1,2,3\*</sup>

<sup>1</sup>College of Food Science and Technology, Huazhong Agricultural University, Wuhan 430070, China

<sup>2</sup>Key Laboratory of Environment Correlative Dietology (Huazhong Agricultural University), Ministry of Education, China

<sup>3</sup>Functional Food Engineering & Technology Research Center of Hubei Province, China

# Both authors contributed equally to the paper

\*To whom correspondence should be addressed.

Tel: +86-27-87282111; Fax: +86-27-87282966

E-mail address: [jing.tian@mail.hzau.edu.cn](mailto:jing.tian@mail.hzau.edu.cn) (Jing Tian)

**Table S1 Diet formula and energy**

|                                      | NCD            |             | HFD           |             |
|--------------------------------------|----------------|-------------|---------------|-------------|
|                                      | gm             | kcal        | gm            | kcal        |
| Casein                               | 200            | 800         | 200           | 800         |
| L-Cystine                            | 3              | 12          | 3             | 12          |
| Corn Starch                          | 506.2          | 2024.8      | 0             | 0           |
| Maltodextrin 10                      | 125            | 500         | 125           | 500         |
| Sucrose                              | 68.8           | 275.2       | 68.8          | 275.2       |
| Cellulose, BW200                     | 50             | 0           | 50            | 0           |
| Soybean Oil                          | 25             | 225         | 25            | 225         |
| Lard                                 | 20             | 180         | 245           | 2205        |
| Mneral Mx S10026                     | 10             | 0           | 10            | 0           |
| DiCalcium Phosphate                  | 13             | 0           | 13            | 0           |
| Calcium Carbonate                    | 5.5            | 0           | 5.5           | 0           |
| Potassium Citrate,1 H <sub>2</sub> O | 16.5           | 0           | 16.5          | 0           |
| Vitamin Mx V10001                    | 10             | 40          | 10            | 40          |
| Choline Bitartrate                   | 2              | 0           | 2             | 0           |
| FD&C Yellow Dye #5                   | 0.04           | 0           | 0             | 0           |
| FD&C Blue Dye #1                     | 0.01           | 0           | 0.05          | 0           |
|                                      | gm %           | kcal %      | gm %          | kcal %      |
| Protein                              | 19.2           | 20          | 26.2          | 20          |
| Carbohydrate                         | 67.3           | 70.0        | 26.3          | 20.1        |
| Fat                                  | 4.3            | 10          | 34.9          | 59.9        |
| Total                                |                | 100         |               | 100         |
| <b>Total</b>                         | <b>1055.05</b> | <b>4057</b> | <b>773.85</b> | <b>4057</b> |
